# 1 **Development and performance evaluation of a low-cost in-house rRT-** 2 **PCR assay in Ecuador for the detection of SARS-CoV-2.**

3 Marco A. Salinas<sup>a</sup>, Diana F. Aguirre<sup>a</sup>, David I. De la Torre<sup>a</sup>, Jorge Pérez-Galarza<sup>a,b</sup>, Ronny J.  
4 Pibaque<sup>a</sup>, Paul A. Beltran<sup>a</sup>, Tatiana J. Veloz<sup>a</sup>, Lucy Y. Baldeón<sup>a,b</sup>.

5 <sup>a</sup> Research Institute of Biomedicine, Central University of Ecuador, Quito 170201, Ecuador

6 <sup>b</sup> Faculty of Medicine, Central University of Ecuador, Quito 170403, Ecuador.

7 Corresponding author.

8 Marco A. Salinas; [masalinas@uce.edu.ec](mailto:masalinas@uce.edu.ec)

## 9 **ABSTRACT**

10 Antecedents: Ecuador has had the greatest fatality rate from Coronavirus (COVID-19) in South  
11 America during the SARS-CoV-2 pandemic. To control the pandemic, it is necessary to test as much  
12 population as possible to prevent the spread of the SARS-CoV-2 infection. For the Ecuadorian  
13 population, accessing a PCR test is challenging, since commercial screening kits tend to be  
14 expensive. Objective: the objective of this study was to develop an in-house duplex rRT-PCR  
15 protocol for the detection of SARS-CoV-2 that contributes to the screening while keeping quality  
16 and low testing costs. Results: An in-house duplex rRT-PCR protocol based on the viral envelope  
17 (E) gene target of SARS-CoV-2 and a human ribonuclease P gene (RP) as an internal control is  
18 reported. The protocol was optimized to obtain primers E with an efficiency of up to 94.45% and  
19 detection of 100% of SARS-CoV-2 up to 15 copies per uL. The clinical performance was determined  
20 by a sensibility of 93.8% and specificity of 98.3%. Conclusion: we developed, standardized, and  
21 validated a low-cost, sensitive in-house duplex rRT-PCR assay that may be utilized in low-income  
22 countries.

23 **Keywords:** COVID-19, coronavirus, E gene, in-house, rRT-PCR.

## 24 **1. Introduction**

25 On March 11, 2020, the World Health Organization (WHO) designated coronavirus disease 2019  
26 (COVID-19) outbreak a pandemic and an international public health emergency [1]. COVID-19  
27 disease is caused by a novel coronavirus, which is highly infectious and can induce severe acute  
28 respiratory syndrome (SARS-CoV2). Until June 2021, the number of cases reported is more than 180  
29 million infections and more than 3 million deaths around the world [2]. The World Health  
30 Organization (WHO) recorded 360 thousand confirmed illnesses and over 18 thousand fatalities in  
31 Ecuador.

32 Ecuador has the highest case fatality rate in the area (4.9 percent) [3]. Furthermore, the country's  
33 death rate increased by 24% in the first trimester of 2021 (mortality comparison between December  
34 2019 and March 2020 vs. December 2020 and March 2021) [4].

35 The existence of asymptomatic persons confuses the precise number of infected patients, which is a  
36 possible danger that stays latent for the disease's spread. As a result, the rate of SARS-CoV-2  
37 infection may be greater than previously thought. [5]. This scenario emphasizes population-wide

NOTE: This preprint reports new research that has not been certified by peer review and should not be used to guide clinical practice.

38 testing and, as a result, the availability of specialized tests for early viral identification and the  
39 implementation of pandemic control epidemiological methods. [6]. Ecuador is one of the countries in  
40 South America with the lowest number of tests per capita (0.2 per 1000 persons each day) [7].

41 The gold standard for SARS-CoV-2 detection is a viral nucleic acid detection technique based on  
42 real-time reverse transcriptase-PCR (rRT-PCR). Commercial kits based on rRT-PCR have been in  
43 great demand across the world due to the technique's excellent sensitivity and specificity in  
44 accurately detecting the virus [8]. The US Food and Drug Administration (FDA) has approved  
45 various rRT-PCR assays targeting viral genes such as nucleocapsid (N), envelope (E), and RNA-  
46 dependent RNA polymerase (RNA-dependent RNA polymerase) (RdRp) [9]. However, numerous  
47 tests have shown that the E gene is somewhat more sensitive than other genetic targets, and the Pan  
48 American Health Organization (PAHO) has advised that the E gene be utilized exclusively for viral  
49 population screening in the Americas during this emergency [10].

50 Because of the COVID-19 pandemic, there has been an increase in the global demand for rRT-PCR  
51 commercial kits for detecting SARS-CoV-2. The scarcity of kits is worse in low-income countries  
52 like Ecuador, where the cost of these kits makes them inaccessible to the government and the general  
53 population. Many laboratories have created in-house assays with excellent sensitivity and specificity  
54 to tackle this challenge by emphasizing test cost reduction. In addition, to minimize the transmission  
55 of the virus by asymptomatic persons, the majority of the population must be screened. Our goal was  
56 to develop an in-house duplex rRT-PCR test that would identify SARS-CoV-2 in human respiratory  
57 samples using the E gene.

## 58 **2. Materials and Methods**

### 59 **2.1. Primers and probes**

60 For the duplex standardization experiment, two sets of primer pairs and probes for the viral E gene  
61 and human ribonuclease P (RP) (internal control) were employed. A multiplex assay was also  
62 attempted using primers targeting RdRp gene. E and RdRp primers/probes were obtained from the  
63 study published by Charité-Universitätsmedizin Berlin Institute of Virology [11]. RP primer/probe  
64 was obtained from the United States of America Centre for Disease Control and Prevention (CDC)  
65 [12]. The probes were labelled with FAM, ROX, and VIC for E, RdRp, and RP, respectively (see  
66 Table 1). All primers and probes were purchased from Eurofins Scientific (Kentucky, USA).

67  
68  
69  
70  
71  
72  
73  
74  
75  
76  
77  
78  
79  
80

81

Table 1. Primers and Probes used in Duplex rRT-PCR.

| Target gene    | Sequence (5'-3')                            | Reference             |
|----------------|---------------------------------------------|-----------------------|
| Gen-E Forward  | ACA GGT ACG TTA ATA GTT AAT AGC GT          | Corman, et al. (2020) |
| Gen-E Reverse  | ATA TTG CAG CAG TAC GCA CAC A               |                       |
| Gen-E Probe    | FAM-ACA CTA GCC ATC CTT ACT GCG CTT CG-BHQ1 |                       |
| RdRp-Forward   | GTG ARA TGG TCA TGT GTG GCG G               | Lu, et al. (2020)     |
| RdRp-Reverse   | CAR ATG TT A AAA ACA CTA TTA GCA TA         |                       |
| Gen-RdRp Probe | ROX-CAG GTG GAA CCT CAT CAG GAG ATG C-BHQ1  |                       |
| RP-Forward     | AGA TTT GGA CCT GCG AGC G                   | Lu, et al. (2020)     |
| RP-Reverse     | GAG CGG CTG TCT CCA CAA GT                  |                       |
| Gen-RP Probe   | VIC-TTC TGA CCT GAA GGC TCT GCG CG-BHQ1     |                       |

82 Abbreviations: RdRp= RNA-dependent RNA polymerase, Rp= human ribonuclease P

## 83 2.2. rRT-PCR reaction optimization

84 To develop the assay, a SARS-CoV-2 RNA source (RNA standardization solution) with a known  
85 concentration (3.81 x 10<sup>5</sup> viral copies per uL) was used. To optimize the final reaction setup,  
86 simplex assays were done. Three sets of primers/probes were used in different concentrations. The  
87 thermocycler program was set up using temperature gradient at 56, 58, and 60 °C. Amplification  
88 products were observed by electrophoresis (2% agarose gel) to verify the specificity of the primers.  
89 With 5 and 3.3 uL of RNA standardization solution, respectively, a final volume of 20 and 10 uL  
90 was tested. The master mix was prepared with the GoTaq Probe 1-step RT-qPCR System reagent  
91 (Promega, USA). The QuantStudio 5 Real-Time PCR equipment (Applied Biosystems, USA) and  
92 BioRad CFX96 (BioRad Laboratories, USA) were used to perform the experiments.

## 93 2.3. In-house duplex and multiplex rRT-PCR develop

94 5 uL of 1X GoTaq Probe qPCR Master Mix, 0.2 uL of 50X GoScript RT Mix 1-Step RT-qPCR, 30  
95 nM CRX reference dye (only for QuantStudio 5), 400/200 nM primers/probe E gene, 200/100 nM  
96 primers/probe RP gene, and 3.3 uL of RNA standardization solution were used to make an in-house  
97 duplex assay. Thermal cycling conditions were 45 °C for 15 min, 95 °C for 2 min, and 40 cycles of  
98 95 °C for 15 secs and 60 °C for 30 secs. For the multiplex assay, 300/150 nM primers/probe RdRp  
99 were added to the duplex setup and RNA standardization solution was decreased to 2.5 uL.

## 100 2.4. Limit of detection (LoD) of duplex rRT-PCR

101 To assess the efficiency of E primers, successive dilutions of the RNA standardization solution were  
102 produced in the range of 512 to 16 copies per uL. Serial dilutions were reduced from 64 to 1 copy  
103 per uL for the LoD of the duplex test. Three distinct operators carried out each test independently,  
104 and the reactions were produced in triplicate.

## 105 2.5. Clinical evaluation and ethical approval

106 The in-house assay was created and tested at the Research Institute in Biomedicine of Central  
107 University of Ecuador (INBIOMED-UCE). The researchers utilized stored RNA from  
108 nasopharyngeal swab samples from COVID-19 suspects who visited INBIOMED in February 2021.  
109 The Ministry of Public Health of Ecuador ethically approved the in-house SARS-CoV-2 assay.

## 110 **2.6. Agreement and Performance**

111 The sample was calculated to achieve a 95 percent level of significance and an 8 percent inference  
112 error. Taking into consideration a 25% probability of positive. As a result, the sample's computed N  
113 was 112, which was raised by 10% to account for probable losses, yielding 124 samples. There were  
114 64 COVID-19 positive samples and 60 COVID-19 negative samples in the study. To evaluate the  
115 agreement/performance, we compared the in-house duplex rRT-PCR results against the commercial  
116 LightMix SarbecoV E-gene plus EAV control kit and LightMix Modular SARS-CoV-2 (COVID-19)  
117 RdRp (TibMolBiol. Germany). For the LightMix E/RdRp kit, the samples were diagnosed as  
118 positive for SARS-CoV-2 when at least one viral gene had a valid CT value [10].

## 119 **2.7. Viral RNA Extraction and in-house duplex rRT-PCR**

120 The Nucleic Acid Extraction kit (Magnetic bead technique) (Zybio, China) was used to extract RNA  
121 from 200 uL of the sample, with an elution volume of 50 uL, according to the manufacturer's  
122 instructions. The RNA was kept at -80 °C until it was needed. An in-house duplex technique was  
123 used to accomplish the rRT-PCR. The reactions for the LightMix E/RdRp kit were carried out  
124 according to the manufacturer's instructions. Bio-Rad CFX96 was used to run the samples.

## 125 **2.8. Statistical analysis**

126 We calculate the positive percent agreement (sensitivity), negative percent agreement (specificity),  
127 positive and negative predictive values, likelihood ratio, and Cohen's Kappa to assess the duplex  
128 rRT-PCR test in clinical samples. SPSS software version 23 was used for the analysis (IBM).

## 129 **3. Results**

### 130 **3.1. rRT-PCR optimization**

131 Simplex rRT-PCR experiments were prepared to find the optimal primers and probes concentration.  
132 The amplicons of these assays were located at the expected positions for the fragment lengths which  
133 were 113 bp, 100 bp, and 50 bp for the E, RdRp, and RP respectively. For the RP set, a low variation  
134 in the Ct was observed when changing RP primer concentrations from 600 nM to 200 nM (with half  
135 of the concentration of its probe). For this reason, 200/100 nM primers/probe concentration was  
136 chosen for all following assays. In the case of E and RdRp sets, 400/200 nM and 300/150 nM,  
137 respectively, was chosen for the remaining experiments because this primers/probe concentration  
138 had one of the lowest Ct (E=18.40, RdRp=25.65). As for the annealing temperature, the lowest Ct  
139 for the E pair of primers was prioritized. The temperature was 60 °C (Data not shown).

### 140 **3.2. In-house duplex and multiplex SARS-CoV-2 assays**

141 Upon optimization of reaction conditions on the simplex set-up we performed a duplex protocol,  
142 which had more consistent results than the multiplex protocol. When the Ct value of a target changed  
143 in more than one of the E and RP sets of primers/probes (Duplex) and E, RdRp, and RP (Multiplex)  
144 primers/probes, the reactions were declared invalid. E target had Ct values consistent across all  
145 assays (Ct 21.77 simplex, 21.83 duplex, 22.13 multiplex). RP readout, which was used to measure  
146 genetic material quality, exhibited similar Ct variation to the E gene, with no more than 0.5. (23.69  
147 duplex, 24.19 multiplex). RdRp profiles were found to be less reproducible than the other two  
148 targets, although their Ct values were within a respectable margin of error between replicates (no  
149 more than 0.5) (see Figure 1). At low quantities of viral RNA (15 viral copies/reaction), the RdRp

150 target showed weak or no amplification curves in further multiplex tests. With a final volume of 10  
 151 uL, all reactions were carried out. Reducing the reaction volume from 20 uL to 10 uL, and therefore  
 152 the volume of RNA standardization solution from 5 uL to 3.3 uL, yielded the same findings without  
 153 interfering with the amplification of E and RP targets. QuantStudio 5 and BioRad CFX96 were both  
 154 compatible with the duplex test.

155

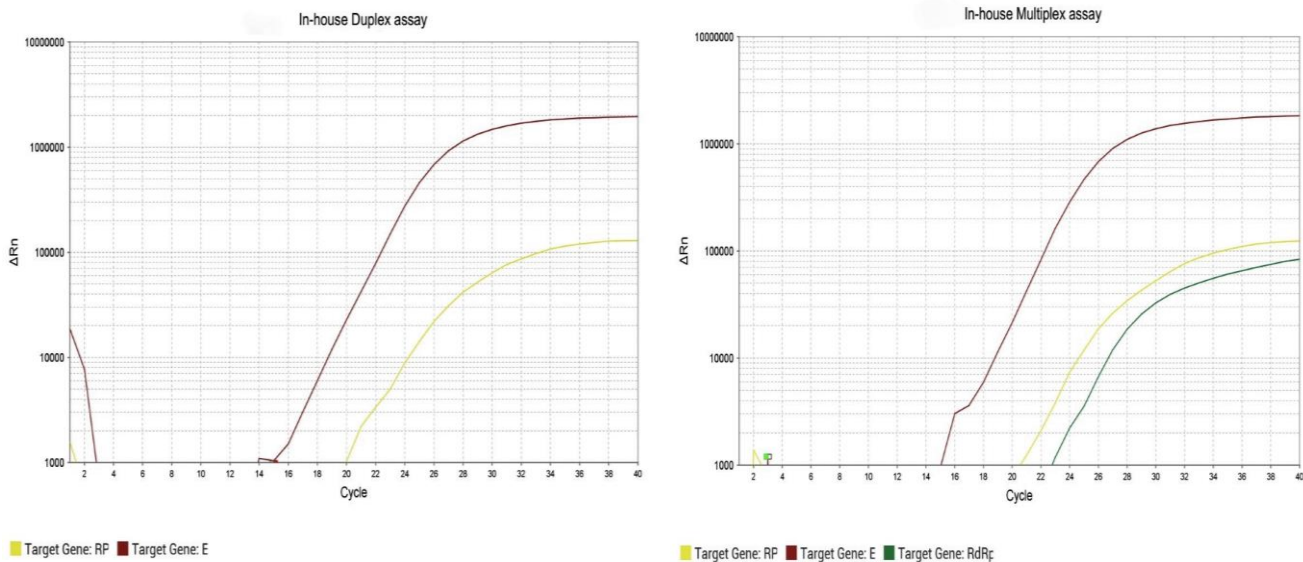

156

157 Figure 1. Amplification plots for duplex and multiplex protocols. Plots were obtained from a QuantStudio 5 Real-Time  
 158 PCR system with detections of the target genes (E, RP, and RdRp).

### 159 3.3. LoD of the in-house duplex assay

160 Serial dilutions of the RNA standardization solution (64, 32, 15, 10, 5, 2, 1 copies/uL) were prepared  
 161 for LoD evaluation. 15 copies/uL (49.5 copies/reaction) with a mean Ct value of 35.99 (CI95 percent  
 162 35.33 – 36.66) was the lowest concentration at which all nine replicates (100%) showed  
 163 amplification curves. (see Table 2). Moreover, the primer efficiency was 94.45%, with an R2 of 98.1  
 164 percent. (see Figure 2).

165

Table 2. Confirmatory LoD Testing Results.

| Target level<br>(copies/uL) | N° Valid tested<br>replicates | SARS-CoV-2 E Gene Positive |         |                |
|-----------------------------|-------------------------------|----------------------------|---------|----------------|
|                             |                               | n*                         | Mean Ct | Detection rate |
| 64                          | 9                             | 9                          | 34.05   | 100%           |
| 32                          | 9                             | 9                          | 35.25   | 100%           |
| 15                          | 9                             | 9                          | 35.99   | 100%           |
| 10                          | 9                             | 5                          | 35.74   | 55.56%         |
| 5                           | 9                             | 6                          | 37.23   | 66.67%         |
| 2                           | 9                             | 4                          | 35.60   | 44.44%         |
| 1                           | 9                             | 2                          | 35.89   | 22.22%         |

166

\* This column contains only valid replicates

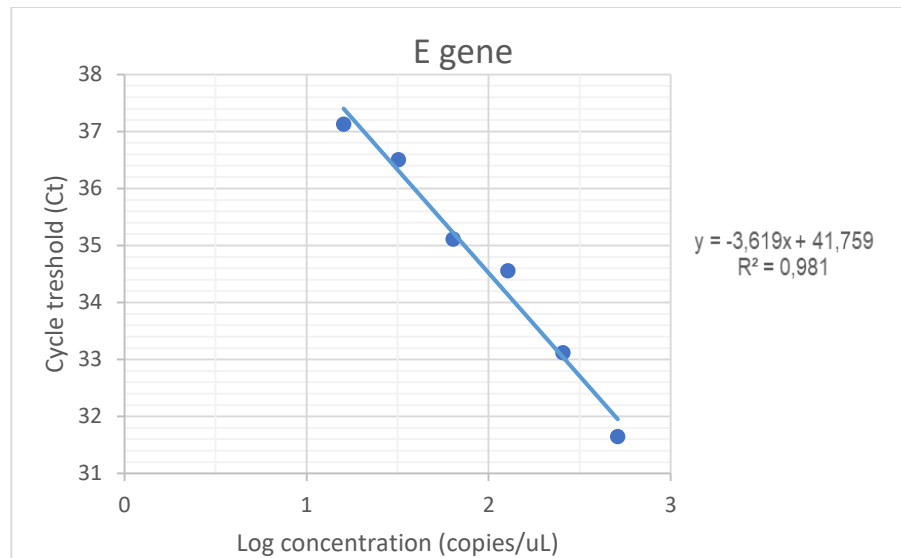

167

168 Figure 2. Standard curve plot of E gene from 2-fold serial dilutions of RNA standardization solution (512, 256, 128, 64,  
169 32, 16 copies/uL). Primers' efficiency = 94.45 %, slope -3.619 and R2 = 0.981.

### 170 3.4. Clinical Evaluation

171 For clinical comparison, we used the commercial LightMix SarbecoV E-gene + EAV control kit,  
172 which identified 64 positives and 60 negatives in nasopharyngeal samples. Sixty-four out of sixty-  
173 four samples were found to be positive using an in-house duplex method. The in-house duplex  
174 procedure found 60 out of 64 samples to be positive (see Table S1 in the Supplementary Material).  
175 Four samples were missed by the duplex test, resulting in 93.8 % sensitivity, 98.3 % specificity, a  
176 Likelihood ratio of 56.25, and a Cohen's K of 0.92 (see Table 3).

177 Table 3. Clinical performance indicators of concordance of E target with in-house duplex rRT-PCR vs. LightMix  
178 E/RdRp kit.

|                         | Sensitivity (%)     | Specificity (%)    | PPV                | NPV                 | LR    | Kappa |
|-------------------------|---------------------|--------------------|--------------------|---------------------|-------|-------|
|                         | (CI95%)             | (CI95%)            |                    |                     |       |       |
| In-house duplex rRT-PCR | 93.8<br>(84.8-98.3) | 98.3<br>(91.1-100) | 98.4<br>(91.2-100) | 93.7<br>(84.5-98.2) | 56.25 | 0.92  |

179 Abbreviations: CI95%= Confidence Interval, PPV = Positive Predictive Value, NPV = Negative Predictive Value, LR =  
180 Likelihood Ratio, Kappa = Cohen's Kappa Index

### 181 4. Discussion

182 Ecuador is one of the South American countries worst hit by the COVID-19 pandemic. Molecular  
183 diagnostics using rRT-PCR is the best approach to detect SARS-CoV-2 virus to restrict its spread  
184 until we achieve herd immunity in the nation. An improved and reproducible rRT-PCR methodology  
185 for the diagnosis of COVID-19 using a viral gene (E) and a human gene (Rp) in a simple reaction  
186 was designed in this work, using primers built according to recognized international guidelines  
187 [11,12]. As a result, 113-bp bands for the E gene and 55-bp bands for the Rp gene were produced  
188 without nonspecific products such as dimers or overlapping sequences that might cause false  
189 positives during the amplification process [13].

190 The sets of primers/probes for the detection of the E and RdRp genes employed to standardize the  
191 technique have a reasonably low nonselective mutation rate and have been reported in similar  
192 researches [14,15]. Following the guidelines of the US Centers for Disease Control and Prevention  
193 (CDC), the Rp gene was utilized as an internal control of RNA extraction [16]. The E gene showed  
194 little variability in duplex and multiplex reactions, according to the amplification graph (Figure 1). In  
195 contrast, using the RdRp gene, repeatability and effectiveness were dramatically reduced at low viral  
196 doses. In accordance with findings from numerous studies, which suggest that the RdRp gene set of  
197 primers/probe is less sensitive than the E gene [17,18]. For this reason, the E gene duplex  
198 combination was chosen. In contrast to Corman et al., who reported a LoD of 3.9 copies/reaction  
199 (95% CI: 2.8–9.8) [11]., we detected 49.5 copies/reaction for the E gene with a probability of 100 %  
200 detection (Table 2). The type of reagents and equipment used during the test might explain the  
201 variation in LoD [19-21].

202 The clinical assessment of the kit revealed that it has a diagnostic sensitivity of 93.8 % and a  
203 specificity of 98.3 %, implying a 6.2 % false negative rate and a 1.7 % false positive rate. In the  
204 assessed population, the degree of agreement of the findings between in-house rRT-PCR and the  
205 commercial LightMix SarbecoV gene E kit is strong (Kappa index = 0.92). Furthermore, our kit has  
206 a positive predictive value of 98.4%, indicating that in a positive test, this percentage of persons  
207 actually has the condition. The 93.7 % negative predictive value indicates that 93.7 percent of those  
208 who get a negative screening test do not have the disease. Meanwhile, the odds of exposure among  
209 case-patients are 56 times greater than the odds of exposure among controls.

210 The limitation of the in-house duplex test is that it can only identify one viral gene (E) and one  
211 internal control gene (Rp). However, the kappa index (0.92) shows that our protocol is comparable to  
212 commercial kits (LightMix E / RdRp) that screen two or more viral genes. Furthermore, because the  
213 E gene is unique to all Sarbecoviruses and because SARS-CoV-2 is the only member of the family  
214 now circulating in humans, the WHO has recommended that the E gene be prioritized as a target. In  
215 this approach, a single viral genetic target suffices for case confirmation in the lab.

## 216 **5. Conclusions**

217 In conclusion, we designed, standardized, and validated an in-house duplex rRT-PCR assay that can  
218 detect SARS-CoV-2 virus presence up to 15 copies/uL. This approach can assist our country enhance  
219 its capacity to screen both symptomatic and asymptomatic carriers by making SARS-CoV-2 rRT-  
220 PCR more accessible.

## 221 **6. Ethical Statement**

222 This study was approved by Health Intelligence Directorate of the Ministry of Public Health of  
223 Ecuador through resolution No MSP-CGDES-2020-0259-O.

## 224 **7. Data Availability**

225 The [TABULAR DATASET] data used to support the findings of this study have been deposited in  
226 the [4TU.RESEARCHDATA] repository (<https://figshare.com/s/1dccb42f2189fbd42a65>).

## 227 **8. Conflict of interest**

228 The authors declare that there is no conflict of interest regarding the publication of this paper.

## 229 **9. Funding**

230 This work was supported by the Académie De Recherche Et D'Enseignement Supérieur – Central  
231 University of Ecuador (ARES-UCE) and Empresa Pública de Bienes y Servicios - Central University  
232 of Ecuador (EP-UCE).

## 233 **10. Acknowledgment**

234 We are extremely grateful to Central University of Ecuador, for his support in managing the needed  
235 funds for the development of this in-house duplex rRT-PCR protocol that would have a great  
236 positive impact in our society.

## 237 **11. Supplementary Materials**

238 The Table S1 used to support the findings of this study has been deposited in the  
239 [4TU.RESEARCHDATA] repository (<https://figshare.com/s/1dccb42f2189fbd42a65>).

## 240 **12. References**

- 241 [1] World Health Organization (WHO), “WHO Director-General’s opening remarks at the media  
242 briefing on COVID-19 - 11 March 2020,” 2020. [https://www.who.int/director-](https://www.who.int/director-general/speeches/detail/who-director-general-s-opening-remarks-at-the-media-briefing-on-covid-19---11-march-2020)  
243 [general/speeches/detail/who-director-general-s-opening-remarks-at-the-media-briefing-on-](https://www.who.int/director-general/speeches/detail/who-director-general-s-opening-remarks-at-the-media-briefing-on-covid-19---11-march-2020)  
244 [covid-19---11-march-2020](https://www.who.int/director-general/speeches/detail/who-director-general-s-opening-remarks-at-the-media-briefing-on-covid-19---11-march-2020).
- 245 [2] World Health Organization (WHO), “COVID-19 weekly epidemiological update, 29 June  
246 2021,” 2021. [https://www.who.int/publications/m/item/weekly-epidemiological-update-on-](https://www.who.int/publications/m/item/weekly-epidemiological-update-on-covid-19---29-june-2021)  
247 [covid-19---29-june-2021](https://www.who.int/publications/m/item/weekly-epidemiological-update-on-covid-19---29-june-2021).
- 248 [3] World Health Organization (WHO), “Geo-Hub COVID-19 - Information System for the  
249 Region of the Americas,” 2021, [Online]. Available: [https://paho-covid19-response-](https://paho-covid19-response-who.hub.arcgis.com/pages/paho-south-america-covid-19-response)  
250 [who.hub.arcgis.com/pages/paho-south-america-covid-19-response](https://paho-covid19-response-who.hub.arcgis.com/pages/paho-south-america-covid-19-response).
- 251 [4] Registro Civil, “Cifras de Defunciones,” 2021. <https://www.registrocivil.gob.ec/cifras/>  
252 (accessed Jun. 05, 2021).
- 253 [5] V. Caturano *et al.*, “Estimating asymptomatic SARS-CoV-2 infections in a geographic area of  
254 low disease incidence,” *BMC Infect. Dis.*, vol. 21, no. 1, pp. 2–5, 2021, doi: 10.1186/s12879-  
255 021-06054-2.
- 256 [6] S. Chadsuthi and C. Modchang, “Modelling the effectiveness of intervention strategies to  
257 control COVID-19 outbreaks and estimating healthcare demand in Germany,” *Public Heal.*  
258 *Pract.*, vol. 2, 2021, doi: <https://doi.org/10.1016/j.puhip.2021.100121>.
- 259 [7] J. Hasell *et al.*, “A cross-country database of COVID-19 testing,” *Sci. Data*, vol. 7, no. 1, pp.  
260 1–7, 2020, doi: 10.1038/s41597-020-00688-8.



- 261 [8] M. Shen *et al.*, “Recent advances and perspectives of nucleic acid detection for coronavirus,”  
262 *J. Pharm. Anal.*, vol. 10, no. 2, pp. 97–101, 2020, doi: 10.1016/j.jpha.2020.02.010.
- 263 [9] S. L. Mitchell *et al.*, “Understanding, verifying, and implementing emergency use  
264 authorization molecular diagnostics for the detection of sars-cov-2 RNA,” *J. Clin. Microbiol.*,  
265 vol. 58, no. 8, pp. 1–8, 2020, doi: 10.1128/JCM.00796-20.
- 266 [10] World Health Organization (WHO), “Laboratory Guidelines for the Detection and Diagnosis  
267 of COVID-19 Virus Infection,” *Paho*, no. Julio, pp. 1–7, 2020, [Online]. Available:  
268 [https://iris.paho.org/bitstream/handle/10665.2/52458/PAHOIMSPHECOVID-](https://iris.paho.org/bitstream/handle/10665.2/52458/PAHOIMSPHECOVID-19200038_eng.pdf?sequence=1&isAllowed=y)  
269 [19200038\\_eng.pdf?sequence=1&isAllowed=y](https://iris.paho.org/bitstream/handle/10665.2/52458/PAHOIMSPHECOVID-19200038_eng.pdf?sequence=1&isAllowed=y).
- 270 [11] V. M. Corman *et al.*, “Detection of 2019 novel coronavirus (2019-nCoV) by real-time RT-  
271 PCR,” *Eurosurveillance*, vol. 25, no. 3, 2020, doi: 10.2807/1560-7917.ES.2020.25.3.2000045.
- 272 [12] X. Lu *et al.*, “US CDC real-time reverse transcription PCR panel for detection of severe acute  
273 respiratory syndrome Coronavirus 2,” *Emerg. Infect. Dis.*, vol. 26, no. 8, pp. 1654–1665,  
274 2020, doi: 10.3201/eid2608.201246.
- 275 [13] M. Park, J. Won, B. Y. Choi, and C. J. Lee, “Optimization of primer sets and detection  
276 protocols for SARS-CoV-2 of coronavirus disease 2019 (COVID-19) using PCR and real-time  
277 PCR,” *Exp. Mol. Med.*, vol. 52, no. 6, pp. 963–977, Jun. 2020, doi: 10.1038/s12276-020-0452-  
278 7.
- 279 [14] D. Eskier, G. Karakülah, A. Suner, Y. Oktay, and I. Biomedicine, “RdRp mutations are  
280 associated with SARS-CoV-2 genome evolution,” *PeerJ*, vol. 8, no. e9587, 2020, doi:  
281 10.7717/peerj.9587.
- 282 [15] Z. Iglói *et al.*, “Comparison of commercial realtime reverse transcription PCR assays for the  
283 detection of SARS-CoV-2,” *J Clin Virol.*, vol. Aug, p. 129:104510, Aug. 2020, doi:  
284 10.1016/j.jcv.2020.104510.
- 285 [16] CDC, “CDC 2019-Novel Coronavirus (2019-nCoV) Real-Time RT-PCR Diagnostic Panel For  
286 Emergency Use Only Instructions for Use,” 2020. [Online]. Available:  
287 <https://www.fda.gov/media/134922/download>.
- 288 [17] A. K. Nalla *et al.*, “Comparative performance of SARS-CoV-2 detection assays using seven  
289 different primer-probe sets and one assay kit,” *J. Clin. Microbiol.*, vol. 58, no. 6, pp. 1–6,  
290 2020, doi: 10.1128/JCM.00557-20.
- 291 [18] C. B. F. Vogels *et al.*, “Analytical sensitivity and efficiency comparisons of SARS-CoV-2  
292 RT-qPCR primer–probe sets,” *Nat. Microbiol.*, vol. 5, no. 10, pp. 1299–1305, 2020, doi:  
293 10.1038/s41564-020-0761-6.
- 294 [19] S. Pfefferle, S. Reucher, D. Nörz, and M. Lütgehetmann, “Evaluation of a quantitative RT-

- 295 PCR assay for the detection of the emerging coronavirus SARS-CoV-2 using a high  
296 throughput system,” *Eurosurveillance*, vol. 25, no. 9, Mar. 2020, doi: 10.2807/1560-  
297 7917.ES.2020.25.9.2000152.
- 298 [20] G. B. Barra, T. H. S. Rita, P. G. Mesquita, R. H. Jácomo, and L. F. A. Nery, “Analytical  
299 sensitivity and specificity of two RT-qPCR protocols for SARS-CoV-2 detection performed in  
300 an automated workflow,” *Genes (Basel)*, vol. 11, no. 10, pp. 1–14, Oct. 2020, doi:  
301 10.3390/genes11101183.
- 302 [21] J. J. LeBlanc *et al.*, “Real-time PCR-based SARS-CoV-2 detection in Canadian laboratories,”  
303 *J. Clin. Virol.*, vol. 128, no. January, p. 104433, Jul. 2020, doi: 10.1016/j.jcv.2020.104433.  
304
